# Supplementary material
Source: PubMed Central journal article supplement (PMC8646313)
Supplement: TID-24-0-s001.pdf [file TID-24-0-s001.pdf]

## **Supplementary figures:**

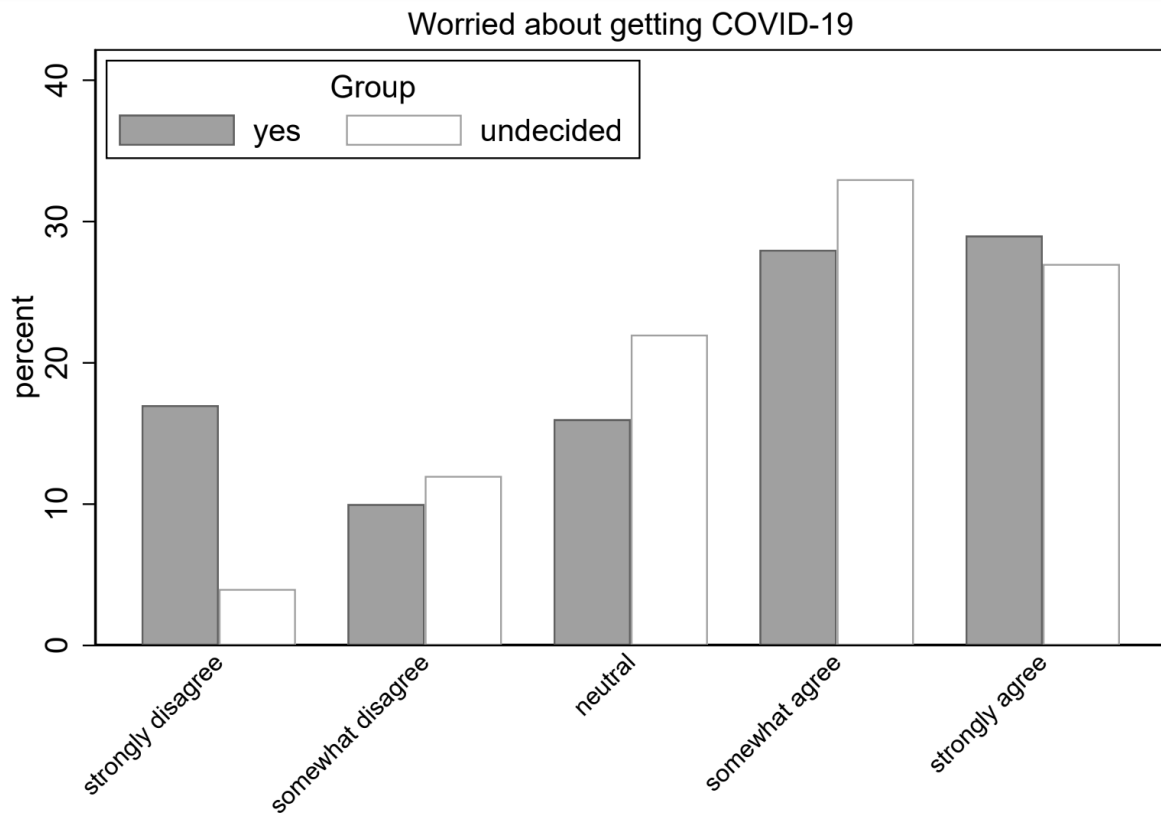

**Supplementary figure S1. Bar graph comparing the strength of agreement to question 'I am worried about getting COVID' in the yes and undecided groups.**

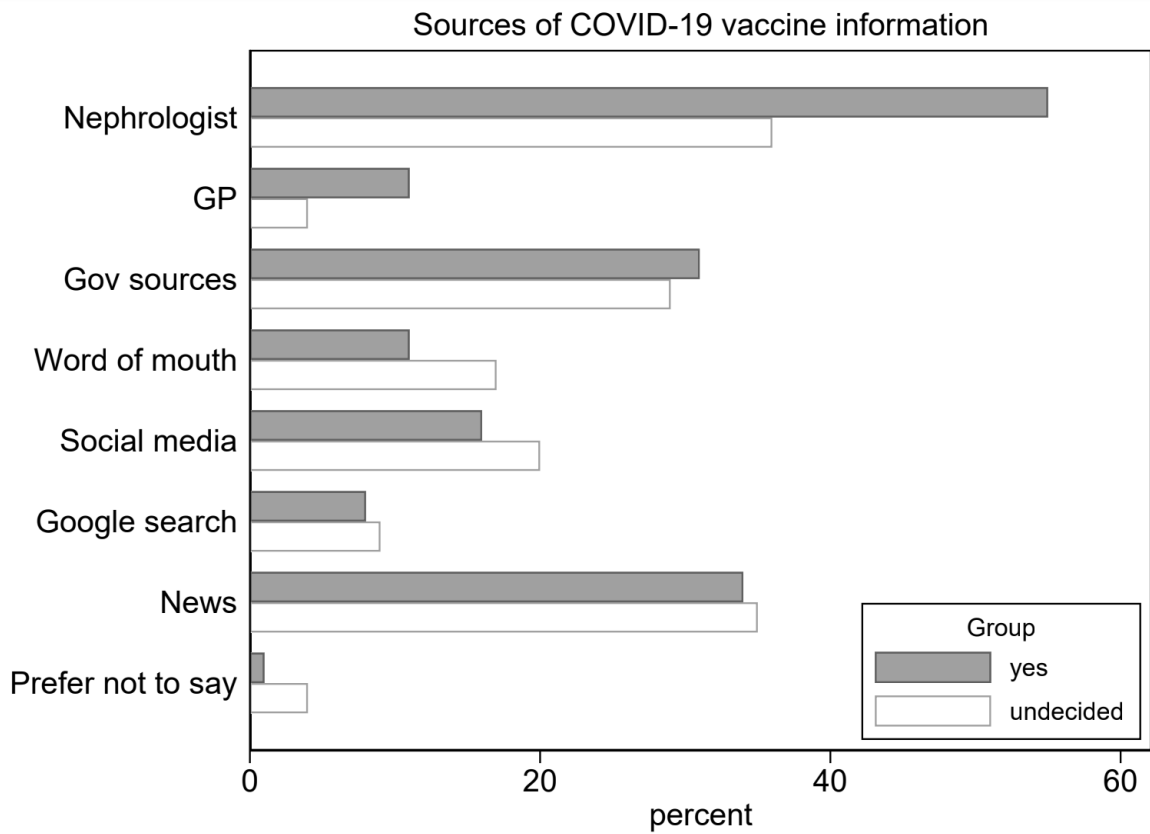

**Supplementary figure S2. Comparing the sources of vaccine information (proportions) amongst the yes and undecided groups.**
